# Supplementary material for: Piloting a Home Visual Support Intervention with Families of Autistic Children and Children with Related Needs Aged 0–12
Source: MDPI journal article supplement (doi:10.3390/ijerph20054401), 2023-03-01
Supplement: s1 [file s1]

## Supplemental files

### Additional file S1: Parent questionnaire pre-post data summary

**Additional Figure:** Parent pre-post questionnaire results, mean (average) scores (n=29)

Item score range 1-5, 1-4 and 1-3 (see below for key)

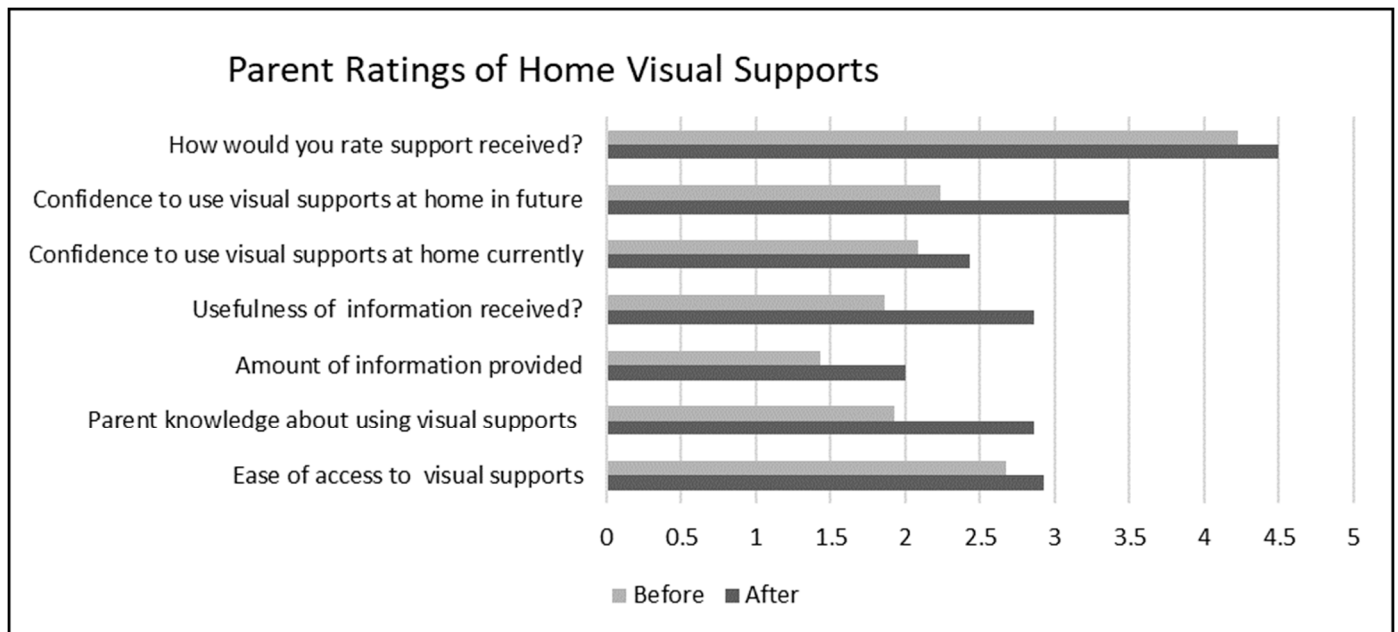

#### Rating key

*How would you **rate** this support received?*

|                               |   |
|-------------------------------|---|
| Extremely Unhelpful           | 1 |
| Unhelpful                     | 2 |
| Neither helpful nor unhelpful | 3 |
| Helpful                       | 4 |
| Extremely helpful             | 5 |

*How **confident** are you to use visual supports at home with your child at the moment?*

|                      |   |
|----------------------|---|
| Not confident at all | 1 |
| A little confident   | 2 |
| Quite confident      | 3 |
| Very confident       | 4 |

*How **confident** are you to use visual supports at home with your child in the future?*

|                      |   |
|----------------------|---|
| Not confident at all | 1 |
| A little confident   | 2 |
| Quite confident      | 3 |
| Very confident       | 4 |

*How **useful** has the information you have received?*

|              |   |
|--------------|---|
| Not useful   | 1 |
| Quite useful | 2 |
| Very useful  | 3 |

*Was the **amount** of information?*

|                  |   |
|------------------|---|
| Not enough       | 1 |
| The right amount | 2 |
| Too much         | 3 |

*How much **knowledge** do you have about visual supports and how your child could use them?*

|      |   |
|------|---|
| None | 1 |
| Some | 2 |

A lot 3

*How **easy** is it to get the visual support symbols or resources that you would like?*

Very hard 1  
Quite hard 2  
Quite easy 3  
Very easy 4
